# Supplementary material for: Low catalytic activity is insufficient to induce disease pathology in triosephosphate isomerase deficiency
Source: PubMed Central journal article supplement (PMC7887927; doi:10.1002/jimd.12105), 2019-06-11
Supplement: JIMD-42-839-s001.pdf [file JIMD-42-839-s001.pdf]

| Test                 | Description                                                                     | Unit        | Female                             | Female wild type       | Male                               | Male wild type       |
|----------------------|---------------------------------------------------------------------------------|-------------|------------------------------------|------------------------|------------------------------------|----------------------|
|                      |                                                                                 |             | TPI <sup>l1e170Val/l1e170Val</sup> |                        | TPI <sup>l1e170Val/l1e170Val</sup> |                      |
| Acoustic_startle_PPI | Percentage Prepulse inhibition - Global                                         | %           | 48.6 (42.1, 57.7)                  | 53.5 (45.8, 64.2)      | 54 (50, 60.2)                      | 53.4 (44.7, 61.9)    |
| Acoustic_startle_PPI | Percentage Prepulse inhibition - PP 67 dB;Percentage Prepulse inhibition - PP67 | %           | 46.1 (38.9, 56.5)                  | 49.2 (41.5, 64.1)      | 47.9 (30.8, 55.2)                  | 55.3 (38.7, 56.9)    |
| Acoustic_startle_PPI | Percentage Prepulse inhibition - PP 69 dB;Percentage Prepulse inhibition - PP69 | %           | 47.7 (41.6, 55.9)                  | 60.8 (44.1, 65.6)      | 54.5 (50.1, 64.2)                  | 51.9 (46.8, 61.8)    |
| Acoustic_startle_PPI | Percentage Prepulse inhibition - PP 73 dB;Percentage Prepulse inhibition - PP73 | %           | 57.5 (40.9, 64.3)                  | 58.7 (47.8, 62.7)      | 58.1 (54.6, 60.5)                  | 56.2 (44.6, 65.1)    |
| Acoustic_startle_PPI | Percentage Prepulse inhibition - PP 81 dB;Percentage Prepulse inhibition - PP81 | %           | 57.8 (43.1, 64.3)                  | 56.3 (46.1, 63.9)      | 60.2 (53.1, 64.9)                  | 56.2 (51.2, 72.2)    |
| Acoustic_startle_PPI | Acoustic Startle Response at 100 dB                                             | dB          | 215.4 (162.9, 260.1)               | 259.6 (196.3, 353.6)   | 341.2 (280.2, 450.7)               | 409.6 (279, 542.5)   |
| Acoustic_startle_PPI | Acoustic Startle Response at 110 dB                                             | dB          | 289.2 (183.9, 340.6)               | 289.7 (245.6, 404.3)   | 423.8 (302.8, 618.7)               | 470.5 (372.5, 643.8) |
| Acoustic_startle_PPI | Acoustic Startle Response at 120 dB                                             | dB          | 266.1 (183.6, 338.3)               | 291.1 (205.3, 406.6)   | 492.7 (307.1, 707.6)               | 629.8 (398, 759.8)   |
| Acoustic_startle_PPI | Acoustic Startle Response at 70 dB                                              | dB          | 95.8 (82.4, 109.5)                 | 100.8 (79.8, 111.2)    | 101.5 (95.1, 120.1)                | 116 (108.9, 132.7)   |
| Acoustic_startle_PPI | Acoustic Startle Response at 80 dB                                              | dB          | 125 (95.8, 157.3)                  | 124.9 (110.2, 155.4)   | 138.9 (136.2, 151.8)               | 154 (132.5, 179.8)   |
| Acoustic_startle_PPI | Acoustic Startle Response at 85 dB                                              | dB          | 127.5 (107.8, 154.6)               | 148.2 (123.6, 191.7)   | 170.9 (152.6, 234.3)               | 179.9 (153.1, 260.4) |
| Acoustic_startle_PPI | Acoustic Startle Response at 90 dB                                              | dB          | 183.7 (150.7, 222.1)               | 202.7 (160.2, 259.4)   | 237.8 (210.2, 349.1)               | 251.2 (190.7, 336.6) |
| Calorimetry          | Total food intake per single-housed mouse and day                               | g           | 2.8 (2.5, 3)                       | 2.5 (2.2, 3.2)         | 2.8 (2.5, 3.3)                     | 3.1 (2.7, 3.4)       |
| Calorimetry          | Body temperature                                                                | °C          | 36.4 (36, 36.6)                    | 36.5 (35.9, 36.6)      | 36.1 (35.6, 36.4)                  | 35.9 (35.8, 36.2)    |
| Calorimetry          | Water consumption in ml                                                         | ml          | 4.1 (3.8, 4.3)                     | 4.5 (3.7, 4.6)         | 4.3 (4, 4.4)                       | 3.9 (3.8, 4.3)       |
| Calorimetry          | Differential distance with reference to the sample interval                     | cm          | 960.2 (816.5, 1349.8)              | 1133.1 (932.1, 1332.1) | 889.1 (792.4, 1039.9)              | 821.6 (687.7, 942.7) |
| Calorimetry          | Mean heat production                                                            | kJ/h/animal | 1.6 (1.6, 1.7)                     | 1.7 (1.6, 1.7)         | 1.8 (1.8, 1.9)                     | 1.8 (1.8, 1.9)       |

|                    |                                                                                                                                                                                                                                                                                                                                                                                                     |                                   |                       |                      |                      |                      |
|--------------------|-----------------------------------------------------------------------------------------------------------------------------------------------------------------------------------------------------------------------------------------------------------------------------------------------------------------------------------------------------------------------------------------------------|-----------------------------------|-----------------------|----------------------|----------------------|----------------------|
| <b>Calorimetry</b> | Mean respiratory exchange rate                                                                                                                                                                                                                                                                                                                                                                      | VCO <sub>2</sub> /VO <sub>2</sub> | 0.9 (0.9, 0.9)        | 0.9 (0.9, 0.9)       | 0.9 (0.9, 0.9)       | 0.9 (0.9, 0.9)       |
| <b>Calorimetry</b> | Mean carbon dioxide production                                                                                                                                                                                                                                                                                                                                                                      | ml/(h animal)                     | 72.3 (70.6, 74.6)     | 73.4 (69.3, 78.7)    | 80.6 (76.3, 83.7)    | 81.4 (77.3, 86.3)    |
| <b>Calorimetry</b> | Mean oxygen consumption per time                                                                                                                                                                                                                                                                                                                                                                    | ml/(h animal)                     | 79.6 (77.2, 83.8)     | 81.3 (78.1, 83.9)    | 88.7 (84.9, 91.4)    | 89.5 (85.7, 93.5)    |
| <b>Calorimetry</b> | Mean breaks X-beam, ambulatory movement: Breaks of any two different X-beams of light at the lower X level. Records beam-breaks of movements in which, for example light barrier X <sub>n</sub> is first interrupted followed by an interruption to a different light barrier X <sub>m</sub> . The counter records the new interruption after a different light barrier has been interrupted first. | counts                            | 602.8 (519.9, 837.9)  | 684.2 (565.6, 738)   | 552.8 (491.4, 670.8) | 525.7 (418.8, 617.6) |
| <b>Calorimetry</b> | Mean breaks X-beam, fine movement: Two consecutive breaks of a single beam of light at the lower level X. The counter records the interruption of a light barrier that has been interrupted for the second time in succession without a different light barrier having first been interrupted.                                                                                                      | counts                            | 227.9 (218.9, 275.7)  | 244.2 (235.7, 261.9) | 226.6 (210.9, 251.9) | 213.6 (195.3, 246.1) |
| <b>Calorimetry</b> | Means breaks X-beam total (is equivalent to XA + XF). A light barrier interruption is counted as either an ambulatory or a fine movement.                                                                                                                                                                                                                                                           | counts                            | 829.1 (740.2, 1116.1) | 928.8 (806.6, 994.6) | 779.4 (700.8, 925.7) | 740.5 (616, 855.9)   |

|                           |                                                                                                                                                                                                                                                                                                                                                                            |        |                         |                        |                        |                         |
|---------------------------|----------------------------------------------------------------------------------------------------------------------------------------------------------------------------------------------------------------------------------------------------------------------------------------------------------------------------------------------------------------------------|--------|-------------------------|------------------------|------------------------|-------------------------|
| <b>Calorimetry</b>        | Mean break Y-beam, ambulatory movement: Breaks of any two different Y-beams of light at the lower Y level. Records beam-breaks of movements in which, for example light barrier Yn ist first interrupted followed by an interruption to a different light barrier Ym. The counter records the new interruption after a different light barrier has been interrupted first. | counts | 569.1 (467.4, 722.3)    | 608.1 (516.2, 693)     | 524.5 (494.1, 646.9)   | 511.9 (393.5, 611.9)    |
| <b>Calorimetry</b>        | Mean breaks Y-beam, fine Movement: Two consecutive breaks of a single beam of light at the lower level Y. The counter records the interruption of a light barrier that has been interrupted for the second time in succession without a different light barrier having first been interrupted.                                                                             | counts | 231.9 (217.5, 268.4)    | 241 (231.1, 260.6)     | 228 (211.6, 251.4)     | 225.2 (194.4, 243)      |
| <b>Calorimetry</b>        | Mean breaks Z-beam, rearing movement: A break of a beam of light at the upper level Z. (No differentiation is made between ambulatory and fine movements.)                                                                                                                                                                                                                 | counts | 132.5 (84.1, 156.1)     | 132 (93.2, 163.1)      | 95.2 (75, 131.1)       | 94 (82.8, 108.3)        |
| <b>Clinical_chemistry</b> | Albumin concentration in plasma                                                                                                                                                                                                                                                                                                                                            | g/l    | 28.8 (28.3, 29.4)       | 28.1 (27.7, 30.1)      | 27.4 (26.9, 27.9)      | 27.4 (26.9, 28.1)       |
| <b>Clinical_chemistry</b> | alpha-amylase test which uses CNPG3 as substrate of the test reaction                                                                                                                                                                                                                                                                                                      | U/l    | 564.54 (550.59, 605.48) | 532.98 (493.2, 578.33) | 692.6 (657.46, 728.56) | 665.36 (640.94, 703.73) |
| <b>Clinical_chemistry</b> | alkaline phosphatase activity in plasma                                                                                                                                                                                                                                                                                                                                    | U/l    | 154 (147, 166.5)        | 143 (138, 159)         | 96 (90.5, 101)         | 95 (87, 100.5)          |
| <b>Clinical_chemistry</b> | Total bilirubin concentration in plasma                                                                                                                                                                                                                                                                                                                                    | μmol/l | 0.2 (0.2, 0.2)          | 0.2 (0.2, 0.2)         | 0.2 (0.2, 0.2)         | 0.2 (0.2, 0.2)          |
| <b>Clinical_chemistry</b> | Calcium concentration in plasma                                                                                                                                                                                                                                                                                                                                            | mmol/l | 2.41 (2.39, 2.44)       | 2.46 (2.42, 2.48)      | 2.42 (2.38, 2.45)      | 2.41 (2.37, 2.43)       |
| <b>Clinical_chemistry</b> | Cholesterol concentration in plasma                                                                                                                                                                                                                                                                                                                                        | mmol/l | 1.999 (1.917, 2.119)    | 2.087 (2.014, 2.194)   | 2.811 (2.572, 2.981)   | 2.777 (2.633, 2.925)    |
| <b>Clinical_chemistry</b> | Chloride concentration in plasma                                                                                                                                                                                                                                                                                                                                           | mmol/l | 113.3 (111.9, 113.8)    | 114.2 (112.8, 115.1)   | 108.9 (108.2, 109.7)   | 108.4 (106.2, 110)      |

|                           |                                                                             |                 |                         |                         |                         |                         |
|---------------------------|-----------------------------------------------------------------------------|-----------------|-------------------------|-------------------------|-------------------------|-------------------------|
| <b>Clinical_chemistry</b> | Creatinine concentration in plasma measured enzymatically                   | μmol/l          | 14.14 (13.97, 14.98)    | 14.76 (14.46, 15.91)    | 15.38 (15.07, 15.87)    | 14.85 (11.89, 16.13)    |
| <b>Clinical_chemistry</b> | Iron concentration in plasma                                                | μmol/l          | 25.2 (23.85, 30.9)      | 26.2 (21.6, 29.5)       | 19.9 (18.25, 21.6)      | 19.2 (18.3, 20.25)      |
| <b>Clinical_chemistry</b> | Glucose concentration in plasma                                             | mmol/l          | 11.53 (10.87, 12.8)     | 12.4 (11.21, 13.5)      | 11.82 (9.73, 12.25)     | 10.47 (9.54, 11.85)     |
| <b>Clinical_chemistry</b> | Aspartate aminotransferase activity in plasma                               | U/l             | 50 (45.5, 68.5)         | 48 (45.5, 63)           | 51 (44.5, 63)           | 50 (43.5, 69.5)         |
| <b>Clinical_chemistry</b> | Alanine aminotransferase activity in plasma                                 | U/l             | 27 (24, 32)             | 26 (22.5, 33)           | 34 (30, 36.5)           | 34 (26, 73.5)           |
| <b>Clinical_chemistry</b> | Potassium concentration in plasma                                           | mmol/l          | 4.3 (4, 4.4)            | 4 (3.8, 4.3)            | 4.4 (4.2, 4.5)          | 4.2 (4, 4.4)            |
| <b>Clinical_chemistry</b> | Lactate concentration in plasma                                             | mmol/l          | 11.32 (10.43, 11.92)    | 11.17 (10.24, 11.61)    | 11.72 (10.95, 12.02)    | 11.02 (10.6, 11.68)     |
| <b>Clinical_chemistry</b> | Sodium concentration in plasma                                              | mmol/l          | 151 (149, 151.5)        | 151 (150, 152)          | 148 (148, 149)          | 148 (146.5, 148)        |
| <b>Clinical_chemistry</b> | Inorganic phosphate concentration in plasma                                 | mmol/l          | 1.1 (1, 1.25)           | 1.3 (0.9, 1.45)         | 1 (0.9, 1.05)           | 1 (0.9, 1.15)           |
| <b>Clinical_chemistry</b> | Total protein concentration in plasma                                       | g/l             | 54.7 (52.2, 55)         | 54.1 (52, 56)           | 54.2 (53, 55)           | 54.2 (53, 55.6)         |
| <b>Clinical_chemistry</b> | Triglyceride concentration in plasma                                        | mmol/l          | 0.927 (0.839, 1.11)     | 0.798 (0.616, 0.837)    | 1.573 (1.438, 1.743)    | 1.659 (1.457, 1.965)    |
| <b>Clinical_chemistry</b> | Unsaturated iron binding capacity in plasma                                 | μmol/l          | 39.2 (28.6, 41.6)       | 37.8 (35.3, 39)         | 41.1 (39.1, 44.5)       | 43.6 (40.4, 45.7)       |
| <b>Clinical_chemistry</b> | Urea concentration in plasma                                                | mmol/l          | 9.57 (8.81, 10.56)      | 9.14 (8.39, 10.45)      | 10.44 (9.48, 11.03)     | 10.57 (9.81, 11.44)     |
| <b>DEXA</b>               | Body length (cm) from nose tip to base of the tail measured during narcosis | cm              | 9.5 (9.4, 9.7)          | 9.5 (9.4, 9.7)          | 9.7 (9.5, 9.9)          | 9.8 (9.5, 9.9)          |
| <b>DEXA</b>               | Fat mass of whole body scan excluding the skull                             | g               | 0.872 (0.16, 1.676)     | 0 (0, 0.99)             | 2.343 (0.661, 5.562)    | 3.909 (1.795, 5.997)    |
| <b>DEXA</b>               | Lean mass of whole body scan excluding the skull                            | g               | 17.093 (16.389, 17.795) | 17.992 (16.889, 18.998) | 20.559 (19.215, 22.216) | 20.742 (19.437, 21.461) |
| <b>DEXA</b>               | Soft mass of whole body scan excluding the skull                            | g               | 18.113 (17.675, 18.479) | 17.925 (17.077, 18.312) | 23.504 (22.05, 25.069)  | 23.868 (23.275, 26.428) |
| <b>DEXA</b>               | Bone area of whole body scan excluding the skull                            | cm <sup>2</sup> | 4.21 (3.319, 6.668)     | 3.662 (2.789, 6.565)    | 4.628 (3.998, 9.854)    | 8.626 (4.845, 10.003)   |
| <b>ECHO_VEVO2100</b>      | Heart rate                                                                  | bpm             | 618.07 (580.47, 635.08) | 582.68 (381.63, 644.3)  | 676.06 (589.97, 723.64) | 654.54 (493.73, 702.46) |
| <b>ECHO_VEVO2100</b>      | Interventricular septum in diastole                                         | mm              | 0.5 (0.43, 0.55)        | 0.53 (0.47, 0.57)       | 0.55 (0.51, 0.6)        | 0.52 (0.51, 0.57)       |
| <b>ECHO_VEVO2100</b>      | Interventricular septum in systole                                          | mm              | 0.48 (0.45, 0.57)       | 0.55 (0.52, 0.61)       | 0.57 (0.53, 0.59)       | 0.55 (0.48, 0.56)       |
| <b>ECHO_VEVO2100</b>      | Left ventricular internal dimension in diastole                             | mm              | 2.32 (2.06, 2.69)       | 2.59 (2.49, 2.99)       | 2.48 (2.31, 2.73)       | 2.67 (2.36, 3.33)       |

|                      |                                                                     |       |                        |                      |                        |                         |
|----------------------|---------------------------------------------------------------------|-------|------------------------|----------------------|------------------------|-------------------------|
| <b>ECHO_VEVO2100</b> | Left ventricular internal dimension in systole                      | mm    | 1.36 (1.21, 1.57)      | 1.47 (1.21, 1.71)    | 1.38 (1.28, 1.61)      | 1.65 (1.37, 2.02)       |
| <b>ECHO_VEVO2100</b> | Left ventricular posterior wall width in diastole                   | mm    | 0.5 (0.48, 0.58)       | 0.54 (0.46, 0.58)    | 0.53 (0.47, 0.56)      | 0.51 (0.5, 0.55)        |
| <b>ECHO_VEVO2100</b> | Left ventricular posterior wall in systole                          | mm    | 0.5 (0.46, 0.54)       | 0.54 (0.49, 0.62)    | 0.5 (0.47, 0.54)       | 0.48 (0.45, 0.54)       |
| <b>ECHO_VEVO2100</b> | Respiration Rate Echo                                               | 1/min | 241.5 (224.83, 272.91) | 256.75 (195, 280.49) | 269.66 (252.19, 291.5) | 282.35 (255.35, 300.05) |
| <b>Eye_size</b>      | Axial length left eye                                               | mm    | 3.533 (3.515, 3.55)    | 3.543 (3.513, 3.57)  | 3.598 (3.564, 3.607)   | 3.603 (3.554, 3.617)    |
| <b>Eye_size</b>      | Axial length right eye                                              | mm    | 3.532 (3.492, 3.543)   | 3.563 (3.526, 3.578) | 3.593 (3.571, 3.601)   | 3.611 (3.579, 3.628)    |
| <b>Eye_size</b>      | Body length                                                         | mm    | 97 (95, 98)            | 98 (96.5, 99)        | 102 (100.5, 103)       | 102 (100, 103)          |
| <b>FACS_blood</b>    | B-1 cells; CD19+CD5+                                                | %     | 0.87 (0.76, 1)         | 0.96 (0.9, 1.16)     | 0.72 (0.68, 0.94)      | 0.81 (0.67, 0.91)       |
| <b>FACS_blood</b>    | B cells expressing high levels of IgD (as percentage of B cells)    | %     | 88 (87, 89.2)          | 88.2 (87.7, 89.9)    | 89.5 (88.75, 90.75)    | 90.6 (89.85, 91.25)     |
| <b>FACS_blood</b>    | MHC II and B220 co-expressing B cells; CD19+MHC II+B220+            | %     | 98 (97.65, 98.15)      | 98.1 (97.7, 98.45)   | 98.6 (98.1, 98.65)     | 98.8 (98.25, 99.1)      |
| <b>FACS_blood</b>    | B cells (CD19+ cells; percentage of living leukocytes)              | %     | 49.3 (47.95, 51.6)     | 48.3 (46.2, 51.5)    | 55.5 (53.55, 59.5)     | 58.3 (50.3, 58.9)       |
| <b>FACS_blood</b>    | T cells (CD3+ cells; percentage of living leukocytes)               | %     | 24 (22.05, 25.9)       | 26.7 (24.45, 27.4)   | 19.9 (16.95, 21.35)    | 20 (18.9, 21.2)         |
| <b>FACS_blood</b>    | CD4+ T cells (percentage of living leukocytes)                      | %     | 10.2 (9.29, 11.5)      | 11.6 (10.75, 12.45)  | 9.13 (7.8, 9.71)       | 9.59 (8.28, 10.25)      |
| <b>FACS_blood</b>    | CD25+ CD4+ T cells (regulatory T cells; percentage of CD4+ T cells) | %     | 4.2 (3.82, 4.78)       | 3.63 (3.18, 3.75)    | 4.9 (4.06, 5.05)       | 4.24 (3.4, 4.49)        |
| <b>FACS_blood</b>    | CD44 expressing CD4 T cells; CD4+CD3e+CD44+                         | %     | 2.59 (2.21, 3.09)      | 2.51 (2.04, 3.03)    | 2.24 (2.1, 3.66)       | 2.59 (2.13, 3.06)       |
| <b>FACS_blood</b>    | L-selectin expressing CD4 T cells; CD4+CD3e+CD62L+                  | %     | 69.1 (55.75, 73.85)    | 70.9 (60.65, 75.25)  | 73.9 (66.4, 77.6)      | 73.7 (70.6, 76.65)      |
| <b>FACS_blood</b>    | CD8+ T cells (percentage of living leukocytes)                      | %     | 11 (9.8, 11.55)        | 11.3 (10.65, 11.85)  | 8.16 (7.32, 9.18)      | 8.35 (7.59, 8.79)       |
| <b>FACS_blood</b>    | CD44 expressing CD8 T cells; CD8a+CD3e+CD44+                        | %     | 2.03 (1.81, 2.49)      | 1.94 (1.48, 2.42)    | 2.26 (1.87, 2.79)      | 2.31 (1.84, 3)          |
| <b>FACS_blood</b>    |                                                                     | %     | 0.9 (0.9, 1.1)         | 1 (0.9, 1.1)         | 0.7 (0.6, 0.7)         | 0.7 (0.6, 0.7)          |
| <b>FACS_blood</b>    | Granulocytes (CD11b+Gr1++; as percentage of living leukocytes)      | %     | 9.84 (7.72, 10.6)      | 8.09 (7.44, 12.1)    | 8.67 (7.92, 9.9)       | 8.3 (6.72, 13.15)       |

|                      |                                                                                                             |                                  |                   |                    |                     |                     |
|----------------------|-------------------------------------------------------------------------------------------------------------|----------------------------------|-------------------|--------------------|---------------------|---------------------|
| <b>FACS_blood</b>    | L-selectin expressing CD8 T cells; CD8a+CD3e+CD62L+                                                         | %                                | 70.5 (58.1, 78.5) | 73.2 (63.85, 78.9) | 76.4 (67.4, 79.2)   | 77 (74.35, 79.95)   |
| <b>FACS_blood</b>    | Monocytes (gated on non-NK cells, non-Granulocytes, CD11b+ cells; shown as percentage of living leukocytes) | %                                | 7.94 (6.97, 8.57) | 7.23 (6.56, 9.03)  | 7.45 (6.66, 8.61)   | 6.36 (5.96, 7.14)   |
| <b>FACS_blood</b>    | CD11b expressing NK cells; CD11b+NK+CD5-                                                                    | %                                | 73 (70.95, 74.35) | 75.5 (72.9, 77.1)  | 63.3 (60.25, 65.05) | 63.8 (57.95, 68.35) |
| <b>FACS_blood</b>    | NK cells (pregated on non-T cells; shown as percentage of living leukocytes)                                | %                                | 3.48 (2.9, 4.23)  | 3.31 (3.01, 3.74)  | 2.88 (2.34, 3.11)   | 3.02 (2.8, 3.38)    |
| <b>FACS_blood</b>    | NK T cells; NK+CD5+                                                                                         | %                                | 0.64 (0.56, 0.7)  | 0.64 (0.57, 0.66)  | 0.53 (0.46, 0.6)    | 0.5 (0.46, 0.55)    |
| <b>Grip_strength</b> | Forelimb grip strength measurement-mean                                                                     | g                                | 96 (90.5, 101)    | 97 (91, 102)       | 135 (130, 142)      | 110 (104.5, 115)    |
| <b>Grip_strength</b> | Forelimb and hindlimb grip strength measurement-mean                                                        | g                                | 184 (181.5, 198)  | 193 (176.5, 201)   | 221 (205, 228.5)    | 200 (190, 214)      |
| <b>Hematology_1</b>  | Hematocrit - percentage of cellular components on whole blood                                               | percent                          | 53.6 (52.2, 56.3) | 53.5 (51.4, 54.3)  | 55.3 (53.6, 56.2)   | 54.6 (52.8, 55.6)   |
| <b>Hematology_1</b>  | Hemoglobin concentration in whole blood                                                                     | g/dl                             | 15.4 (15.1, 16)   | 15.2 (14.7, 15.5)  | 15.3 (15.2, 15.8)   | 15.2 (14.8, 15.5)   |
| <b>Hematology_1</b>  | Calculated mean corpuscular hemoglobin content of erythrocytes                                              | pg                               | 14.7 (14.5, 15.1) | 14.5 (14.4, 14.8)  | 14.1 (14, 14.3)     | 14.2 (14, 14.3)     |
| <b>Hematology_1</b>  | Calculated mean corpuscular hemoglobin concentration of erythrocytes                                        | g/dl                             | 28.9 (28.7, 29.1) | 28.7 (28.2, 28.9)  | 28.1 (27.7, 28.4)   | 28.2 (27.9, 28.4)   |
| <b>Hematology_1</b>  | Mean corpuscular volume                                                                                     | fl                               | 51 (50, 52)       | 51 (51, 52)        | 50 (50, 51)         | 50 (50, 51)         |
| <b>Hematology_1</b>  | Mean platelets volume                                                                                       | fl                               | 5.2 (5.2, 5.2)    | 5.2 (5.2, 5.3)     | 5.3 (5.2, 5.4)      | 5.3 (5.2, 5.4)      |
| <b>Hematology_1</b>  | Absolute number of eosinophile in whole blood                                                               | 10 <sup>3</sup> /mm <sup>3</sup> | 0.1 (0.1, 0.1)    | 0.1 (0.1, 0.1)     | 0.1 (0.1, 0.1)      | 0.1 (0.1, 0.1)      |
| <b>Hematology_1</b>  | Absolute number of neutrophile granulocytes in whole blood                                                  | 10 <sup>3</sup> /mm <sup>3</sup> | 1.5 (1.35, 1.7)   | 1.45 (1.15, 1.87)  | 1.9 (1.6, 2.15)     | 1.7 (1.5, 1.9)      |
| <b>Hematology_1</b>  | Absolute number of lymphocytes in whole blood                                                               | 10 <sup>3</sup> /mm <sup>3</sup> | 4.7 (4.4, 6)      | 5.4 (4.6, 6.27)    | 7 (5.9, 7.45)       | 6.3 (5.2, 7.65)     |
| <b>Hematology_1</b>  | Absolute number of monocytes in whole blood                                                                 | 10 <sup>3</sup> /mm <sup>3</sup> | 0.3 (0.3, 0.4)    | 0.3 (0.3, 0.4)     | 0.4 (0.3, 0.45)     | 0.3 (0.25, 0.35)    |

|                          |                                                                   |                                  |                         |                         |                         |                         |
|--------------------------|-------------------------------------------------------------------|----------------------------------|-------------------------|-------------------------|-------------------------|-------------------------|
| <b>Hematology_1</b>      | Percentage of eosinophiles in total white blood cells             | %                                | 1.3 (1.1, 1.5)          | 1.4 (1, 1.7)            | 1 (0.8, 1.3)            | 1.1 (1, 1.2)            |
| <b>Hematology_1</b>      | Percentage of neutrophile granulocytes in total white blood cells | %                                | 19.8 (17.45, 22.95)     | 18.45 (17.45, 20.6)     | 18.6 (17.45, 20.4)      | 17.4 (16.5, 23.7)       |
| <b>Hematology_1</b>      | Platelet count in whole blood                                     | 10 <sup>3</sup> /mm <sup>3</sup> | 1215 (1134, 1378)       | 1212 (1180, 1260)       | 1584 (1500, 1648)       | 1592 (1422, 1624)       |
| <b>Hematology_1</b>      | Percentage of lymphocytes in total white blood cells              | %                                | 74.8 (71.6, 76.9)       | 76.15 (74.23, 77.65)    | 77 (75.15, 78.2)        | 78.9 (71.4, 79.65)      |
| <b>Hematology_1</b>      | Percentage of monocytes in total white blood cells                | %                                | 5.2 (4.95, 5.9)         | 5 (4.4, 6.05)           | 4.4 (4.25, 4.75)        | 4.1 (3.6, 4.5)          |
| <b>Hematology_1</b>      | Red blood cell count in whole blood                               | Mio/mm <sup>3</sup>              | 10.48 (10.23, 10.88)    | 10.45 (10.11, 10.59)    | 10.99 (10.72, 11.25)    | 10.69 (10.48, 11.09)    |
| <b>Hematology_1</b>      | Red cell distribution width (coefficient of variation)            | percent                          | 14 (13.9, 14.2)         | 14 (13.6, 14.4)         | 13.7 (13.4, 13.9)       | 13.6 (13.2, 13.9)       |
| <b>Hematology_1</b>      | Total white blood cell count in whole blood                       | 10 <sup>3</sup> /mm <sup>3</sup> | 6.4 (6, 8)              | 7.4 (6.5, 8.9)          | 9.7 (8.4, 10.3)         | 8.3 (6.9, 10.1)         |
| <b>Hotplate</b>          | time of first response in hotplate test                           | s                                | 9.7 (6.2, 12.3)         | 11.1 (10.1, 12.9)       | 9.6 (7, 12.1)           | 8.4 (6.7, 11.9)         |
| <b>Hotplate</b>          | time of 2nd response in hotplate test                             | s                                | 14.7 (10.4, 20)         | 16 (13.8, 20.1)         | 17.5 (15.1, 20.5)       | 18.2 (14.7, 21.6)       |
| <b>Immunoglobulins_1</b> | anti DNA autoantibodies in plasma                                 | OD                               | 0.279 (0.248, 0.353)    | 0.267 (0.242, 0.288)    | 0.216 (0.198, 0.243)    | 0.262 (0.243, 0.306)    |
| <b>Immunoglobulins_1</b> | Immunoglobulin A concentration in plasma                          | µg/ml                            | 693.53 (584.42, 714.56) | 631.69 (468.78, 750.89) | 710.12 (555.57, 874.5)  | 513.71 (381.88, 640.53) |
| <b>Immunoglobulins_1</b> | Immunoglobulin G1 concentration in plasma                         | µg/ml                            | 128.63 (84.31, 145.09)  | 98.16 (79.56, 134.23)   | 66.62 (57.28, 93.36)    | 67.19 (60.25, 85.74)    |
| <b>Immunoglobulins_1</b> | Immunoglobulin G2a concentration in plasma                        | µg/ml                            | 65.56 (51.57, 75.01)    | 63.96 (55.02, 72.52)    | 47.02 (43.93, 61.41)    | 51.07 (41.13, 54.64)    |
| <b>Immunoglobulins_1</b> | Immunoglobulin G2b concentration in plasma                        | µg/ml                            | 441.89 (377.38, 512.73) | 399.29 (352.08, 454.11) | 222.34 (171.32, 265.65) | 250.86 (211.55, 257.51) |
| <b>Immunoglobulins_1</b> | Immunoglobulin G3 concentration in plasma                         | µg/ml                            | 211.47 (203.83, 280.67) | 229.96 (181.57, 317.72) | 205.63 (158.62, 246.33) | 201.37 (168.47, 234.37) |
| <b>Immunoglobulins_1</b> | Immunoglobulin M concentration in plasma;CD3-CD19+/CD8+CD4-       | µg/ml                            | 441.44 (390.33, 515.04) | 494.68 (424.4, 537.72)  | 385.24 (332.95, 527.92) | 422.94 (389.17, 521.33) |
| <b>Immunoglobulins_1</b> | Rheumatoid factor in plasma                                       | OD                               | 0.38 (0.32, 0.48)       | 0.31 (0.26, 0.38)       | 0.27 (0.22, 0.31)       | 0.26 (0.24, 0.29)       |
| <b>Immunoglobulins_2</b> | Immunoglobulin E concentration in plasma                          | ng/ml                            | 14.5 (12.5, 28.8)       | 14.9 (10.2, 21.4)       | 17 (10.1, 21.7)         | 13.6 (10.9, 15)         |
| <b>IPGTT</b>             | Blood glucose concentration at T0                                 | nmol/l                           | 4.6 (4.2, 5.1)          | 4.5 (4.4, 4.9)          | 6.3 (5.5, 7.2)          | 7 (5.6, 7.5)            |

|                      |                                                                                |                  |                         |                         |                   |                   |
|----------------------|--------------------------------------------------------------------------------|------------------|-------------------------|-------------------------|-------------------|-------------------|
| <b>IPGTT</b>         | Blood glucose concentration<br>5 minutes after at T0                           | nmol/l           | 18.5 (17.6, 20)         | 20.1 (18.4, 20.8)       | 24.3 (23.1, 25.6) | 22.1 (20.7, 25.4) |
| <b>IPGTT</b>         | Blood glucose concentration<br>30 minutes after at T0                          | nmol/l           | 13.3 (12.3, 14.6)       | 12.9 (12.4, 15.8)       | 23.4 (20.8, 26.4) | 22.5 (19.7, 24.3) |
| <b>IPGTT</b>         | Blood glucose concentration<br>60 minutes after at T0                          | nmol/l           | 8.4 (7.7, 8.8)          | 8.7 (8.2, 9.2)          | 13.7 (12.9, 15.6) | 13.8 (13, 15.6)   |
| <b>IPGTT</b>         | Blood glucose concentration<br>120 minutes after at T0                         | nmol/l           | 6.1 (5.3, 6.6)          | 6.2 (5.5, 6.6)          | 8.8 (7.3, 9.1)    | 8.3 (8, 9.3)      |
| <b>Lung_function</b> | lung compliance                                                                | ml/cm H2O        | 0.0528 (0.0507, 0.055)  | 0.0572 (0.0538, 0.0604) | NA (NA, NA)       | NA (NA, NA)       |
| <b>Lung_function</b> | dynamic compliance of<br>respiratory system (breathing<br>rate 130/min)        | ml/cm H2O        | 0.0226 (0.0221, 0.0236) | 0.0237 (0.0222, 0.0252) | NA (NA, NA)       | NA (NA, NA)       |
| <b>Lung_function</b> | Expiratory reserve volume,<br>FVC - IC                                         | ml               | 0.29 (0.27, 0.35)       | 0.29 (0.29, 0.3)        | NA (NA, NA)       | NA (NA, NA)       |
| <b>Lung_function</b> | Volume expired in first 100<br>ms of fast expiration                           | ml               | 0.782 (0.751, 0.837)    | 0.835 (0.819, 0.889)    | NA (NA, NA)       | NA (NA, NA)       |
| <b>Lung_function</b> | the volume in the lungs at the<br>end-expiratory position                      | ml               | 0.248 (0.227, 0.276)    | 0.248 (0.238, 0.262)    | NA (NA, NA)       | NA (NA, NA)       |
| <b>Lung_function</b> | Forced Vital Capacity, volume<br>expired during fast expiration                | ml               | 0.794 (0.757, 0.853)    | 0.861 (0.838, 0.905)    | NA (NA, NA)       | NA (NA, NA)       |
| <b>Lung_function</b> | inspiratory Capacity, volume<br>inspired during slow<br>inspiration            | ml               | 0.665 (0.64, 0.694)     | 0.706 (0.678, 0.749)    | NA (NA, NA)       | NA (NA, NA)       |
| <b>Lung_function</b> | Peak Expiratory Flow,<br>maximum speed of expiration                           | ml/sec           | 29.1 (28.7, 30.1)       | 29.6 (29.5, 29.7)       | NA (NA, NA)       | NA (NA, NA)       |
| <b>Lung_function</b> | Resistance, measurement<br>performed with Buxco<br>FinePointerRC System        | cm<br>H2O/ml/sec | 1.39 (1.35, 1.42)       | 1.33 (1.28, 1.39)       | NA (NA, NA)       | NA (NA, NA)       |
| <b>Lung_function</b> | the volume in the lungs at<br>maximal inflation, the sum of<br>VC and RV       | ml               | 0.0446 (0.0446, 0.0446) | 0.0221 (0.0217, 0.0225) | NA (NA, NA)       | NA (NA, NA)       |
| <b>Lung_function</b> | the volume in the lungs at<br>maximal inflation, the sum of<br>VC and RV       | ml               | 0.899 (0.886, 0.948)    | 0.966 (0.925, 0.997)    | NA (NA, NA)       | NA (NA, NA)       |
| <b>Lung_function</b> | that volume of air moved into<br>or out of the lungs during<br>quiet breathing | ml               | 0.214 (0.213, 0.216)    | 0.218 (0.215, 0.22)     | NA (NA, NA)       | NA (NA, NA)       |



|                      |                                                                                                |         |                            |                          |                          |                            |
|----------------------|------------------------------------------------------------------------------------------------|---------|----------------------------|--------------------------|--------------------------|----------------------------|
| <b>Lung_function</b> | the volume of air breathed out after the deepest inhalation.                                   | ml      | 0.98 (0.97, 1)             | 1 (0.96, 1.08)           | NA (NA, NA)              | NA (NA, NA)                |
| <b>OCT</b>           | Number of main vessels in the left fundus, observed by optical coherence tomography procedure  |         | 10 (9, 11)                 | 10 (9, 11)               | 10 (9, 11)               | 10 (9, 11)                 |
| <b>OCT</b>           | Retinal thickness in the left eye, observed by the optical coherence tomography procedure      | µm      | 250 (248, 253)             | 248 (246, 250)           | 252 (251, 254)           | 246 (246, 250)             |
| <b>OCT</b>           | Number of main vessels in the right fundus, observed by optical coherence tomography procedure |         | 9 (9, 10)                  | 9 (8, 10)                | 10 (8, 10)               | 10 (10, 11)                |
| <b>OCT</b>           | Retinal thickness in the right eye, observed by the optical coherence tomography procedure     | µm      | 254 (247, 259)             | 250 (246, 256)           | 249 (247, 252)           | 247 (244, 252)             |
| <b>Open_field</b>    | Distance travelled - Total; Distance travelled total                                           | cm      | 14136.8 (13576.1, 20093.9) | 17208 (15358.2, 19252.2) | 17001.9 (14144, 20238.6) | 17647.6 (16362.5, 19009.8) |
| <b>Open_field</b>    | Number of rears - Total                                                                        |         | 71 (60, 76.5)              | 86 (70, 91)              | 89 (69, 103)             | 80 (73, 104.5)             |
| <b>Open_field</b>    | % distance in the centre - Total                                                               | %       | 29.2 (26.1, 34)            | 31.5 (26.2, 32.7)        | 22.2 (19.7, 26.9)        | 27.4 (20.6, 31.9)          |
| <b>Open_field</b>    | % time spent in the centre - Total                                                             | percent | 18 (16.9, 25.4)            | 21.4 (15.1, 25.1)        | 16.4 (13.6, 18)          | 22.2 (15.8, 27.4)          |
| <b>Organ_weights</b> | Heart weight                                                                                   | mg      | 127 (121, 129)             | 132 (126, 136)           | 158 (153, 160)           | 149 (148, 151)             |
| <b>Organ_weights</b> | Liver weight                                                                                   | g       | 0.997 (0.981, 1.05)        | 0.975 (0.938, 1.091)     | 1.29 (1.164, 1.31)       | 1.351 (1.32, 1.524)        |
| <b>Organ_weights</b> | Spleen weight                                                                                  | g       | 0.092 (0.088, 0.096)       | 0.098 (0.096, 0.134)     | 0.072 (0.067, 0.082)     | 0.08 (0.07, 0.083)         |
| <b>Organ_weights</b> | Tibia length                                                                                   | mm      | 17.6 (17.39, 17.92)        | 17.35 (17.3, 17.5)       | 18.24 (18.09, 18.28)     | 18.1 (17.98, 18.47)        |
| <b>qNMR</b>          | Fat mass determination at NMR                                                                  | g       | 4.8 (4.4, 5.1)             | 4.6 (4.4, 4.8)           | 5.8 (5.5, 6.2)           | 6.2 (5.7, 6.5)             |
| <b>qNMR</b>          | Lean mass determination at NMR                                                                 | g       | 12.9 (12.7, 13.4)          | 12.6 (12.5, 13.1)        | 17.3 (16.4, 17.7)        | 17.4 (16.8, 18.5)          |
| <b>Rotarod</b>       | Latency to fall-trial 1                                                                        | s       | 192 (114, 207.5)           | 144 (62.5, 193)          | 126 (58, 149)            | 117 (89.5, 151)            |
| <b>Rotarod</b>       | Latency to fall-trial 2                                                                        | s       | 211 (168.5, 227)           | 172 (65, 214)            | 180 (151, 192.5)         | 170 (160.5, 189.5)         |
| <b>Rotarod</b>       | Latency to fall-trial 3                                                                        | s       | 200 (170.5, 226)           | 225 (205, 240)           | 186 (113, 201.5)         | 189 (152, 219.5)           |
| <b>Rotarod</b>       | latency to fall - mean of trials                                                               | s       | 180 (156, 206)             | 176 (144, 198)           | 164 (132, 176)           | 159 (136, 180)             |
| <b>Scheimpflug</b>   | Mean density value of the left                                                                 | %       | 5.5 (5.2, 5.7)             | 5.5 (5.3, 5.7)           | 5.6 (5.5, 5.8)           | 5.7 (5.5, 5.9)             |

| lens                |                                      |                       |                      |                      |                      |                      |
|---------------------|--------------------------------------|-----------------------|----------------------|----------------------|----------------------|----------------------|
| <b>Scheimpflug</b>  | Mean density value of the right lens | %                     | 5.1 (4.8, 5.4)       | 5.2 (5, 5.4)         | 5 (4.8, 5.2)         | 5.3 (5.1, 5.6)       |
| <b>SHIRPA</b>       | Locomotor Activity                   | squares crossed/30sec | 30 (24, 32)          | 30 (28, 33)          | 26 (24, 30)          | 27 (23, 30)          |
| <b>Steroids</b>     | Plasma level of corticosterone       | nmol/l                | 412.7 (285.7, 585.9) | 577.3 (383.9, 711.5) | 136.2 (102.9, 189.8) | 110.3 (57.4, 160)    |
| <b>Virtual_drum</b> | threshold of spatial frequency       | cyc/deg               | 0.347 (0.34, 0.362)  | 0.344 (0.33, 0.366)  | 0.353 (0.343, 0.37)  | 0.339 (0.328, 0.374) |
